# Supplementary material for: Interface synthesis for controllable construction of 2D Zn(Bim)(OAc) nanosheetsviaoil/water system and their application in oil
Source: Royal Society of Chemistry journal article supplement (doi:10.1039/d0ce01624a), 2020-12-10
Supplement: d0ce01624a1.pdf [file d0ce01624a1.pdf]

## Supporting information

Interface synthesis for controllable construction of 2D Zn(Bim)(OAc)  
nanosheets via oil/water system and their application in oil

Fei-Fei Wang, Haiyang Ding, Guang Tan, Zan Liu, Zhi-Lin Cheng\*

School of Chemistry and Chemical Engineering, Yangzhou University, Yangzhou 22  
5002, China.

Corresponding author: Prof. Zhi-Lin Cheng, Email: [zcheng224@126.com](mailto:zcheng224@126.com)

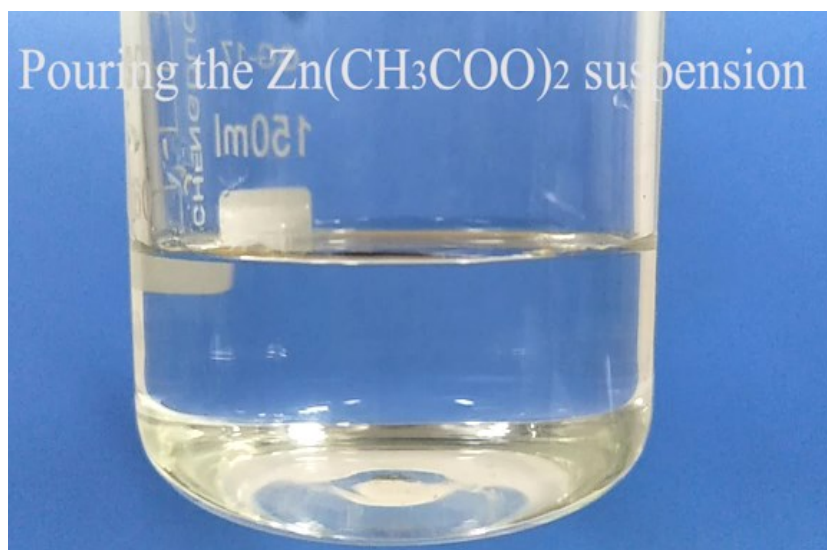

Fig. S1. The video of the formation of Zn(Bim)(OAc) nanosheets at O/W interface system.

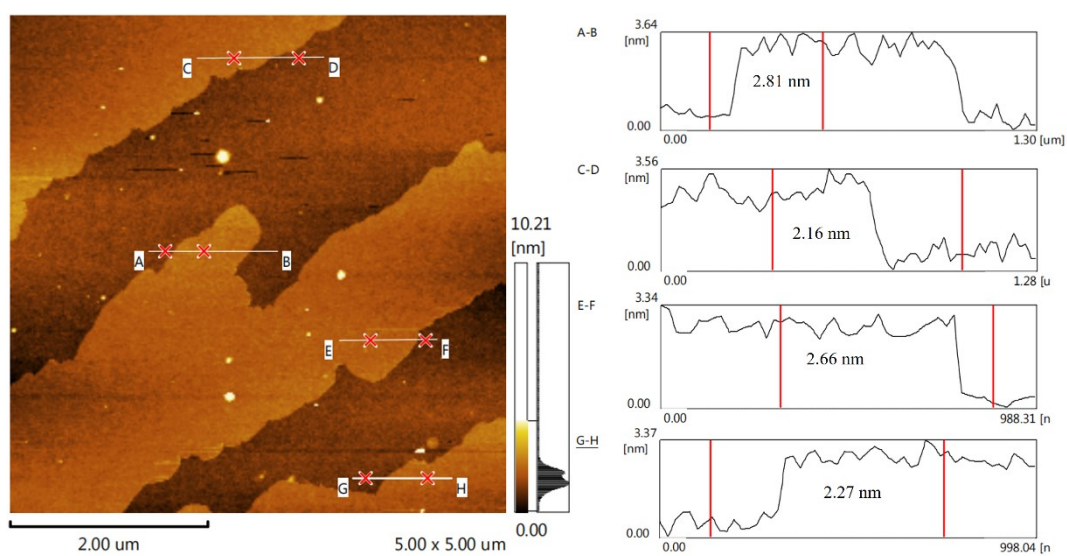

Fig. S2. AFM images of the as-synthesized Zn(Bim)(OAc) nanosheets.

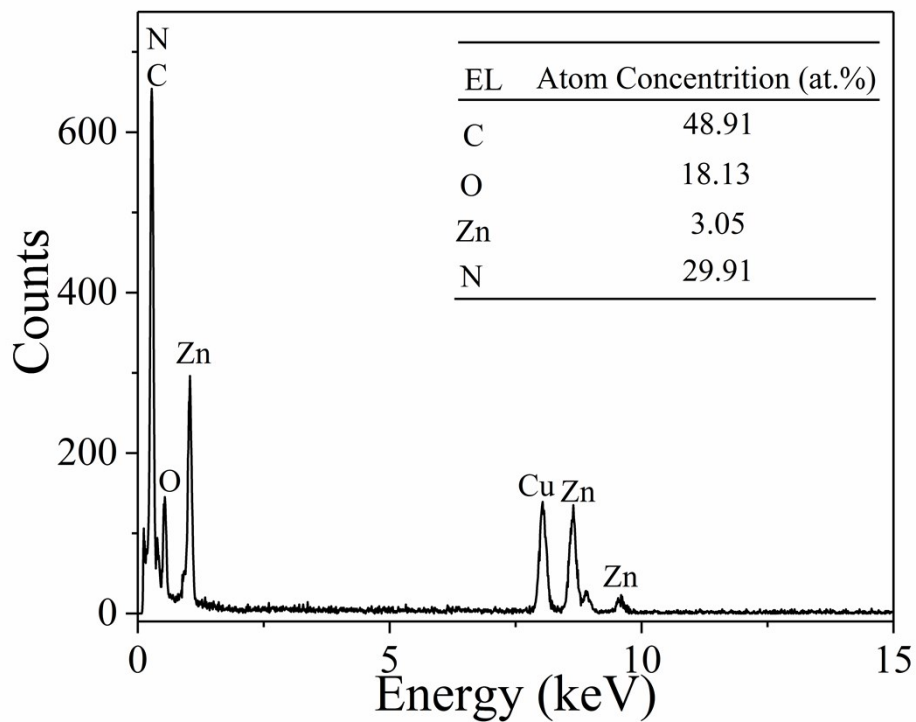

Fig. S3. EDS spectra of the as-synthesized Zn(Bim)(OAc) nanosheets.

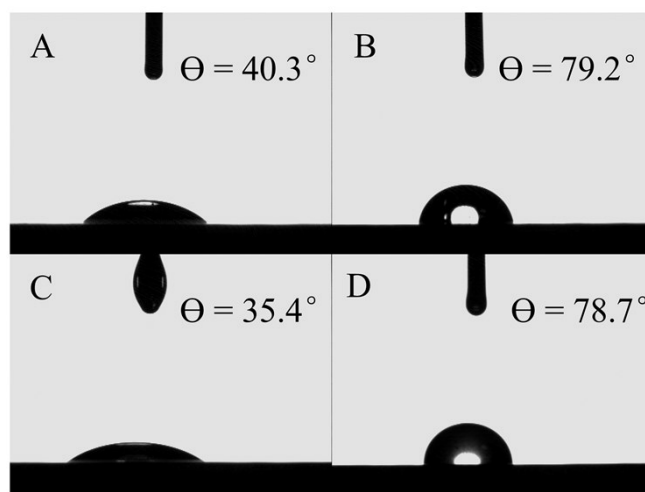

Fig. S4. The contact angles of (A) base oil, (B) castor oil, (C) base oil-Zn(Bim)(OAc) nanosheets and (D) castor oil-Zn(Bim)(OAc) nanosheets on the 304 stainless steel.

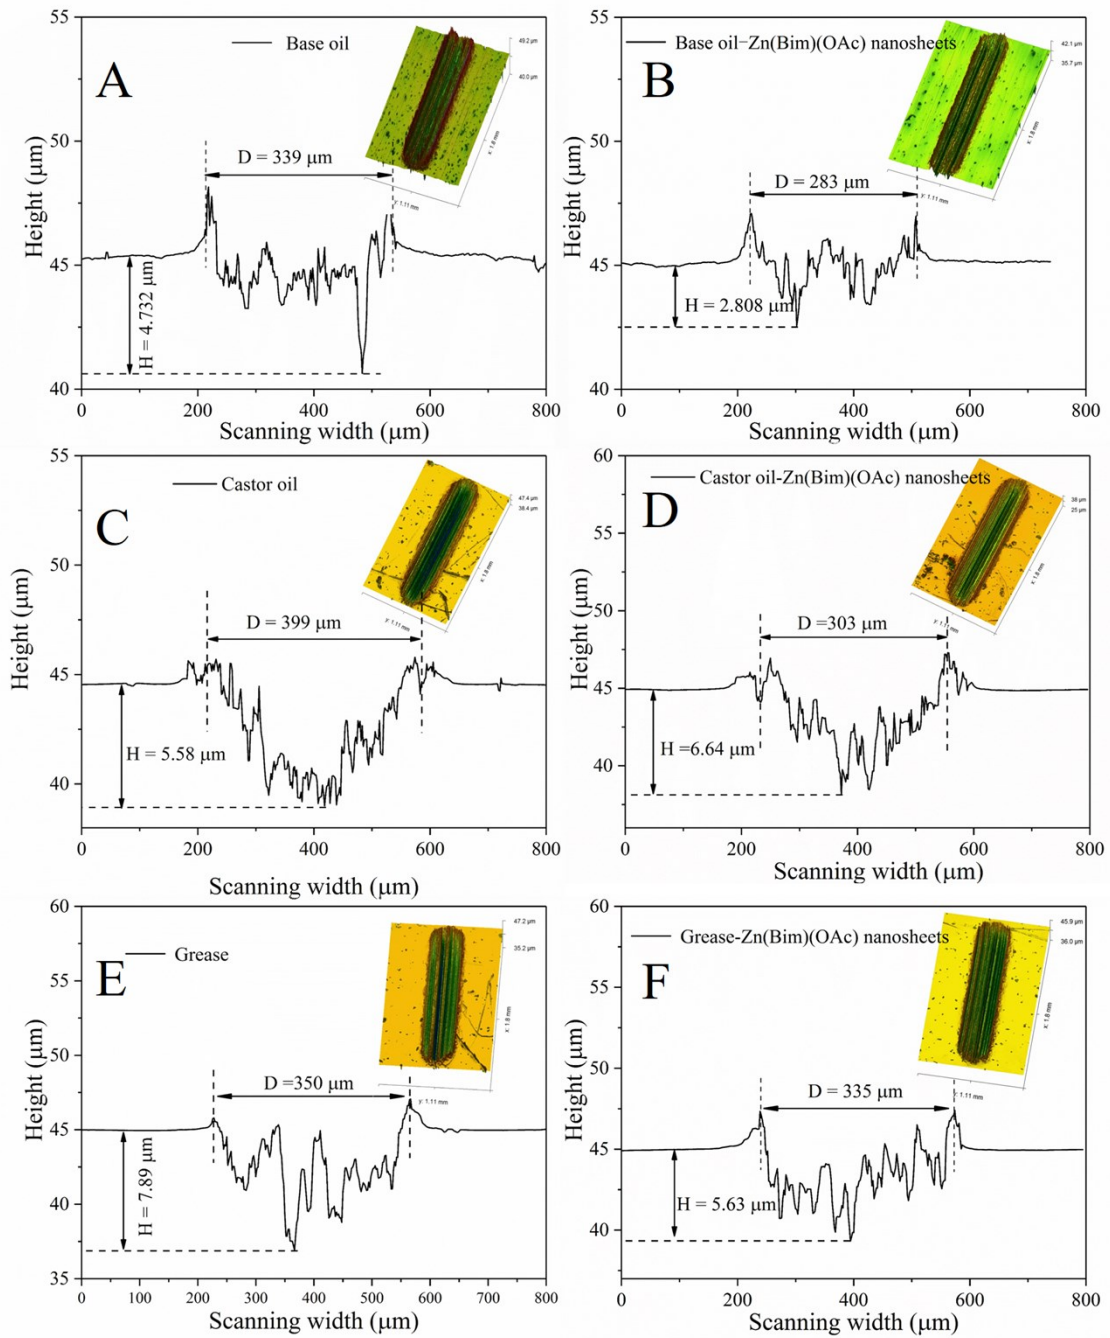

Fig. S5. 3D worn surface topography (inset) and 2D cross section profiles perpendicular to sliding direction of (A) base oil, (B) base oil-Zn(Bim)(OAc) nanosheets, (C) castor oil, (D) castor oil-Zn(Bim)(OAc) nanosheets, (E) grease, (F) grease-Zn(Bim)(OAc) nanosheets.
